# Supplementary material for: Development and validation of a clinical decision support system based on PSA, microRNAs, and MRI for the detection of prostate cancer
Source: PubMed Central journal article supplement (PMC11255044; doi:10.1007/s00330-023-10542-1), 2024-01-04
Supplement: 330_2023_10542_MOESM1_ESM.pdf [file 330_2023_10542_MOESM1_ESM.pdf]

Supplementary Table 1: MRI acquisition protocols for Centers A and B

|                                    | Center A    |                                 |             | Center B    |                                        |             |
|------------------------------------|-------------|---------------------------------|-------------|-------------|----------------------------------------|-------------|
|                                    | T2w         | DWI                             | DCE         | T2w         | DWI                                    | DCE         |
| <b>Field of view (mm)</b>          | 160 x 160   | 160 x 160                       | 200 x 200   | 180 x 180   | 180 x 180                              | 180 x 180   |
| <b>In plane resolution (mm)</b>    | 0.36 x 0.36 | 2.23 x 2.23                     | 0.71 x 0.71 | 0.38 x 0.38 | 1.88 x 1.88                            | 0.94 x 0.94 |
| <b>section thickness/gap (mm)</b>  | 3/0         | 3/0                             | 3/0         | 3/0         | 3/0                                    | 3/0         |
| <b>Repetition time (ms)</b>        | 3020        | 7000                            | 3.6         | 5403        | 2919                                   | 4.7         |
| <b>Echo time (ms)</b>              | 85          | 101                             | 1.3         | 100         | 61                                     | 2.2         |
| <b>Flip angle (degrees)</b>        | 160         | 90                              | 20          | 90          | 90                                     | 10          |
| <b>b-values (s/mm<sup>2</sup>)</b> | -           | 0, 800;<br>1000<br>(calculated) | -           | -           | 50, 500,<br>1000; 1700<br>(calculated) | -           |

T2w: T2weighted image, DWI: Diffusion-weighted imaging, DCE: Dynamic Contrast Enhanced
